# Supplementary material
Source: PubMed Central journal article supplement (PMC3874466)
Supplement: NIHMS536214-supplement-01.pdf [file NIHMS536214-supplement-01.pdf]

**Table S1. Number of the Differentially Expressed Genes of Each In Vitro Model and Their Enriched Gene Ontology Categories, Related to Figure 1**

**Upregulated genes**

| in vitro model | # Upregulated genes | Top GO of upregulated genes                  | # gene in GO <sup>a</sup> | p-value* |
|----------------|---------------------|----------------------------------------------|---------------------------|----------|
| TNF $\alpha$   | 1307                | immune response                              | 111                       | 9.8E-29  |
|                |                     | defense response                             | 75                        | 6.4E-10  |
| Dex            | 547                 | response to peptide hormone stimulus         | 16                        | 1.8E-04  |
|                |                     | positive regulation of programmed cell death | 24                        | 1.0E-03  |
| High Ins       | 719                 | sterol biosynthetic process                  | 19                        | 1.2E-15  |
|                |                     | lipid biosynthetic process                   | 46                        | 5.6E-14  |
| Hypoxia        | 786                 | transcription                                | 143                       | 4.5E-14  |
|                |                     | glycolysis                                   | 16                        | 5.3E-08  |
| Cotreatment    | 3065                | immune response                              | 153                       | 1.6E-20  |
|                |                     | translation                                  | 115                       | 5.1E-19  |

**Downregulated genes**

| in vitro model | # Downregulated genes | Top GO of downregulated genes               | # gene in GO <sup>a</sup> | p-value* |
|----------------|-----------------------|---------------------------------------------|---------------------------|----------|
| TNF $\alpha$   | 1388                  | fatty acid metabolic process                | 39                        | 1.5E-06  |
|                |                       | negative regulation of biosynthetic process | 64                        | 1.1E-05  |
| Dex            | 486                   | NA                                          |                           |          |
| High Ins       | 924                   | translation                                 | 40                        | 3.6E-05  |
|                |                       | transcription                               | 122                       | 1.8E-03  |
| Hypoxia        | 1158                  | oxidation reduction                         | 81                        | 8.4E-08  |
|                |                       | fatty acid metabolic process                | 36                        | 1.1E-07  |
| Cotreatment    | 2974                  | oxidation reduction                         | 183                       | 3.1E-15  |
|                |                       | coenzyme metabolic process                  | 56                        | 2.0E-9   |

Only the top two categories were shown.

a: It represents the number of upregulated or downregulated genes which are included in the particular GO category.

\*P-values were calculated by Fisher-Exact tests assessing the significance of over-representation. Multiple hypothesis testings were corrected by Benjamini-Hochberg correction.

**Table S2. Diet-Induced Obese Mouse Adipose Tissue Expression Data Sets Used in This Study, Related to Figures 2 and 3**

| DIO mouse dataset | High-fat diet* | Duration of high-fat feeding | Method     | Accession No. |
|-------------------|----------------|------------------------------|------------|---------------|
| WAT1              | 60%            | 12 weeks                     | Microarray | GSE14363      |
| WAT2              | 30%            | 24 weeks                     | Microarray | GSM498652     |
| WAT3              | 45%            | 13 weeks                     | Microarray | GSE28440      |

\* indicate the percent of calories from fat

**Table S3. Adipogenesis Data Sets Used in This Study, Related to Figures 2 and 3**

| Adipogenesis dataset                         | Abbreviation  | Method     | Accession No. |
|----------------------------------------------|---------------|------------|---------------|
| 3T3-L1 preadipocyte differentiation in vitro | Adipogenesis1 | Microarray | GSE20696      |
| 3T3-L1 preadipocyte differentiation in vitro | Adipogenesis2 | Microarray | GSE14004      |
| Primary preadipocyte differentiated in vitro | Adipogenesis3 | RNA-Seq    | GSE29899      |

**Table S4. Results from Gene Set Enrichment Analysis Based on Genome-wide Data and the 1,319 Adipogenesis-Related Genes, Related to Figure 3**

See Excel file

**Table S5. DNA Sequence Motif Analysis of Regions that Gain DNase Hypersensitivity after the Different Insulin Resistance Treatments, Related to Figure 4**

| <b>TNF<math>\alpha</math></b> |                  |             |
|-------------------------------|------------------|-------------|
| Motif                         | P-value          | CV error    |
| <b>Bach,FRA1</b>              | <b>6.6E-135</b>  | <b>0.28</b> |
| <b>CREB</b>                   | <b>3.4E-109</b>  | <b>0.37</b> |
| <b>NF-kappaB</b>              | <b>2.6E-102</b>  | <b>0.33</b> |
| <b>C/EBP</b>                  | <b>3.0E-102</b>  | <b>0.37</b> |
| Tax/CREB                      | 3.0E-93          | 0.40        |
| <b>Nrf-2</b>                  | <b>8.2E-86</b>   | <b>0.33</b> |
| RORA                          | 7.8E-67          | 0.41        |
| TEF-1                         | 1.8E-55          | 0.41        |
| Ik-1                          | 4.7E-46          | 0.40        |
| DEAF1                         | 2.1E-31          | 0.42        |
| <b>Hypoxia</b>                |                  |             |
| Motif                         | P-value          | CV error    |
| <b>Bach</b>                   | <b>3.9E-210</b>  | <b>0.28</b> |
| <b>Nrf-2</b>                  | <b>4.7E-111</b>  | <b>0.33</b> |
| <b>Tax/CREB</b>               | <b>4.1E-84</b>   | <b>0.36</b> |
| <b>RORA</b>                   | <b>8.6E-70</b>   | <b>0.38</b> |
| <b>CREB</b>                   | <b>1.5E-59</b>   | <b>0.37</b> |
| PPARG                         | 2.5E-42          | 0.45        |
| Myc                           | 4.9E-38          | 0.42        |
| Arnt/Hif                      | 1.7E-33          | 0.42        |
| ER                            | 5.3E-24          | 0.41        |
| Pax                           | 7.0E-24          | 0.43        |
| <b>Dexamethasone</b>          |                  |             |
| Motif                         | P-value          | CV error    |
| <b>GR</b>                     | <b>9.81E-186</b> | <b>0.33</b> |
| <b>Arnt/Hif</b>               | <b>7.46E-109</b> | <b>0.39</b> |
| <b>Bach</b>                   | <b>8.16E-104</b> | <b>0.37</b> |
| Nrf-2                         | 8.56E-54         | 0.41        |
| <b>Myc</b>                    | <b>9.06E-40</b>  | <b>0.38</b> |
| VDR:RXR                       | 4.35E-37         | 0.41        |
| C/EBP                         | 1.23E-32         | 0.40        |
| CREB                          | 1.72E-28         | 0.43        |
| TEF                           | 4.44E-28         | 0.40        |
| NF-1                          | 1.66E-24         | 0.45        |
| <b>High Insulin</b>           |                  |             |

| Motif     | P-value | CV error |
|-----------|---------|----------|
| E2F       | 5.7E-24 | 0.44     |
| NF-1      | 4.5E-22 | 0.42     |
| AP-2alpha | 3.1E-14 | 0.46     |
| Zfx       | 1.8E-12 | 0.46     |
| Whn, AhR  | 2.2E-10 | 0.45     |
| Arnt/Hif  | 2.9E-10 | 0.45     |
| MIZF      | 1.4E-08 | 0.44     |
| CNOT3     | 4.8E-08 | 0.46     |
| PEA3      | 4.9E-08 | 0.47     |
| Olf-1     | 2.0E-07 | 0.46     |

Motifs highlighted in bold are those with a cross-validation error (CV error) < 0.4.

**Table S6. DNA Sequence Motif Analysis of Regions that Lose DNase Hypersensitivity after the Different Insulin Resistance Treatments, Related to Figure 4**

| <b>TNF<math>\alpha</math></b> |                |             |
|-------------------------------|----------------|-------------|
| Motif                         | P-value        | CV error    |
| MyoD,TCF3                     | 2.3E-95        | 0.40        |
| <b>NF-1</b>                   | <b>3.6E-90</b> | <b>0.39</b> |
| Arnt/Hif                      | 1.9E-69        | 0.43        |
| E2F                           | 2.4E-52        | 0.40        |
| Myc                           | 5.7E-41        | 0.43        |
| <b>Tal-1</b>                  | <b>5.7E-31</b> | <b>0.39</b> |
| TGIF                          | 3.6E-27        | 0.44        |
| AP-4                          | 2.1E-26        | 0.45        |
| XBP-1                         | 6.4E-25        | 0.44        |
| PPAR                          | 1.1E-22        | 0.44        |
| <b>Hypoxia</b>                |                |             |
| Motif                         | P-value        | CV error    |
| XBP1                          | 1.9E-29        | 0.43        |
| Myc                           | 8.7E-28        | 0.41        |
| NRF1                          | 6.1E-20        | 0.42        |
| MyoD,TCF3                     | 5.7E-15        | 0.42        |
| AP-4                          | 6.0E-14        | 0.43        |
| AhR, Arnt, HIF-1              | 7.9E-11        | 0.43        |
| TCF3                          | 1.1E-08        | 0.44        |
| TTF1                          | 1.0E-07        | 0.44        |
| MTF1                          | 4.8E-06        | 0.45        |
| P53                           | 1.3E-05        | 0.46        |
| <b>Dexamethasone</b>          |                |             |
| Motif                         | P-value        | CV error    |
| NF-1                          | 1.2E-75        | 0.42        |
| MyoD,TCF3                     | 2.9E-46        | 0.41        |
| HEN1                          | 2.7E-24        | 0.43        |
| Elk-1                         | 1.0E-20        | 0.45        |
| Tal-1                         | 3.6E-20        | 0.42        |
| Nanog                         | 2.8E-19        | 0.45        |
| AP-4                          | 5.6E-18        | 0.44        |
| AP-2alphaA                    | 4.2E-17        | 0.46        |
| E2F                           | 1.8E-16        | 0.43        |
| Ikzf1                         | 3.1E-15        | 0.45        |

| <b>High Insulin</b> |                |             |
|---------------------|----------------|-------------|
| Motif               | P-value        | CV error    |
| <b>Nrf-2</b>        | <b>4.2E-79</b> | <b>0.37</b> |
| E2F                 | 6.1E-65        | 0.42        |
| Myc                 | 3.7E-48        | 0.40        |
| <b>Arnt/Hif</b>     | <b>1.9E-45</b> | <b>0.38</b> |
| RORA                | 1.2E-44        | 0.40        |
| <b>Bach</b>         | <b>3.8E-43</b> | <b>0.34</b> |
| Tax/CREB            | 3.4E-40        | 0.41        |
| XBP-1               | 8.2E-35        | 0.40        |
| C/EBP               | 1.1E-33        | 0.41        |
| ATF6                | 1.6E-32        | 0.42        |

Motifs highlighted in bold are those with a cross-validation error (CV error) < 0.4.



**Table S7. DNA Sequence Motif Analysis of Enriched Regions Identified from p65 ChIP-Seq Experiment, Related to Figure 4**

| Motif Name       | P value          | CV error    |
|------------------|------------------|-------------|
| <b>NF-kappaB</b> | <b>2.94E-164</b> | <b>0.27</b> |
| <b>C/EBP</b>     | <b>8.06E-53</b>  | <b>0.37</b> |
| PARP             | 8.26E-43         | 0.43        |
| TEF-1            | 3.50E-27         | 0.43        |
| RBP-Jkappa       | 2.42E-19         | 0.44        |
| GABP             | 2.92E-19         | 0.42        |
| E2F              | 1.34E-18         | 0.41        |
| Olf-1            | 1.79E-18         | 0.43        |
| Helios A         | 8.32E-16         | 0.42        |
| MAF              | 5.53E-15         | 0.45        |
| HSF              | 7.14E-14         | 0.45        |
| MIZF             | 2.09E-13         | 0.42        |
| STAT             | 1.82E-11         | 0.44        |
| EBF              | 2.24E-10         | 0.43        |

Motifs highlighted in bold are those with a cross-validation error (CV error) < 0.4.

**Table S8. Primers Used in the Current Study, Related to Figures 1, 3, and 5**

qPCR primers

|        |                                                   |
|--------|---------------------------------------------------|
| Adipoq | TGGAATGACAGGAGCTGAAGG<br>GCGAATGGGTACATTGGGAAC    |
| Fasn   | GGAGGTGGTGATAGCCGGTAT<br>TGGGTAATCCATAGAGCCCAG    |
| Pparg  | TCGCTGATGCACTGCCTATG<br>GAGAGGTCCACAGAGCTGATT     |
| Glut4  | GTGACTGGAACACTGGTCCTA<br>CCAGCCACGTTGCATTGTAG     |
| Glut1  | CAGTTCGGCTATAAACTGGTG<br>GCCCCGACAGAGAAGATG       |
| Cebpa  | CCCACTCAGCTTACAACAGG<br>GCTGGCGACATACAGTACAC      |
| Cebpb  | ACACGTGTAAGTGCAGCCG<br>GCTCGAAACGGAAAAGGTTC       |
| Rps27  | CCTTCATCCCTCTCCAGAAGA<br>CCGTGGTGATTTTATAGCATCTC  |
| Ccl2   | TTAAAACCTGGATCGGAACCAA<br>GCATTAGCTTCAGATTTACGGGT |
| Ccl5   | GCTGCTTTGCCTACCTCTCC<br>TCGAGTGACAAACACGACTGC     |
| Ccl9   | GCTGCTTTGCCTACCTCTCC<br>TCGAGTGACAAACACGACTGC     |
| Tnf    | CCCTCACACTCAGATCATCTTCT<br>GCTACGACGTGGGCTACAG    |
| Il6    | TAGTCCTTCCTACCCCAATTTCC<br>TTGGTCCTTAGCCACTCCTTC  |
| Mmp2   | CAAGTTCCCCGGCGATGTC<br>TTCTGGTCAAGGTCACCTGTC      |

ChIP-PCR primers

|       |                                                   |
|-------|---------------------------------------------------|
| Lcn2  | GCGGGGTAGTCCATCCTTTACCA<br>CCCTGTGCCTGCCAGAATCCAA |
| Socs3 | AGAAACATAAACTCCCGTCT<br>CCCATAAGCACAGATCAGC       |
| Irf2  | TCTGCCCACCTCTTACCAC<br>CCAATGCCCCATGAGTCG         |
| Glut1 | ACAGCCCGTCATTGCAAG<br>CCTACTGTGCCCGTCCA           |

|      |                             |
|------|-----------------------------|
| III5 | ATCGCCTCAAAGCTTGGTC         |
|      | CGGCCAATAACATTGAGTCAC       |
| Alb  | CAATGAAATGCGAGGTAAGTATGG    |
|      | TCTTTAACCAATAACTGTAGATCATTA |
